# Supplementary material
Source: PubMed Central journal article supplement (PMC5125150)
Supplement: 10815_2016_793_MOESM1_ESM.pdf [file 10815_2016_793_MOESM1_ESM.pdf]

Online Resource 1. Characteristics of infertile couples with and without chromosomal polymorphisms

|                                               | group 1         | group 2         | group 3         |
|-----------------------------------------------|-----------------|-----------------|-----------------|
| Data on patients (mean ± SD)                  |                 |                 |                 |
| Male age                                      | 32.95±5.63      | 31.40±5.14      | 31.95±4.84      |
| Female age                                    | 30.81±5.09      | 31.66±4.91      | 31.76±5.38      |
| Female body mass index                        | 22.27±3.65      | 22.18±2.72      | 22.81±3.02      |
| Data on disease factors                       |                 |                 |                 |
| Obstructive factors rate (n) %                | (19/348)6.03    | (7/99)7.07      | (58/835) 6.95%  |
| OAT <sup>a</sup> rate (n) %                   | (116/348)33.3   | (37/99)37.4     | (260/835)31.3%  |
| Ovarian diseases rate (n) %                   | (43/348)12.4    | (16/99)16.2     | (89/835)10.7    |
| UPF <sup>b</sup> diseases rate (n) %          | (257/348)73.9   | (76/99)76.7     | (639/835)76.5   |
| Data on sperm (one semen sample per patient)  |                 |                 |                 |
| Sperm concentration (million/ml)              | 86.29±39.66     | 89.36±46.90     | 88.3±45.26      |
| Sperm progressive motility <sup>c</sup> (%)   | 52.82±15.92     | 56.96±13.89     | 57.23±15.26     |
| Sperm normal morphology rate <sup>d</sup> (%) | NS <sup>e</sup> | NS              | NS              |
| Data on hormones (mean ± SD)                  |                 |                 |                 |
| Male basal FSH (mIU/L)                        | 9.34±11.63      | 8.40±10.21      | 9.78 ± 6.39     |
| Male basal LH (mIU/L)                         | 6.68 ±7.33      | 7.56 ±6.99      | 6.46± 6.23      |
| Male basal testosterone (ng/dl)               | 48.52 ± 69.03   | 39.75 ± 61.98   | 44.57 ± 59.28   |
| Male basal oestradiol (pg/ml)                 | 37.89 ± 11.10   | 36.45 ±9.95     | 33.66 ± 12.36   |
| Male basal prolactin (ng/ml)                  | 279.43 ± 111.80 | 323.22 ± 213.76 | 256.52 ± 189.36 |
| Female basal FSH (mIU/L)                      | 6.67±2.31       | 6.51±1.94       | 6.93±2.62       |
| Female basal LH (mIU/L)                       | 5.19±3.78       | 5.23±3.53       | 4.46±1.84       |
| Female basal testosterone (ng/dl)             | 0.82 ± 0.46     | 0.89 ± 0.35     | 0.94 ± 0.34     |
| Female basal oestradiol (pg/ml)               | 43.26 ± 11.56   | 50.51 ± 17.50   | 46.37 ± 17.31   |
| Female basal prolactin (ng/ml)                | 289.39 ± 109.62 | 313.09 ± 117.35 | 326.79 ± 129.72 |
| Female basal progesterone (ng/ml)             | 0.91 ± 0.17     | 1.12 ± 0.32     | 1.03 ± 0.23     |

|                                             |             |             |             |
|---------------------------------------------|-------------|-------------|-------------|
| Data on the HCG day                         |             |             |             |
| Dosage of Gn (ml)                           | 0.86±0.22   | 0.79±0.16   | 0.85±0.25   |
| Days of Gn                                  | 13.35±1.57  | 14.35±1.67  | 12.83±1.17  |
| E2 level on HCG day(pg/ml)                  | 5090±2369   | 4740±2200   | 5563±2508   |
| P level on HCG day(ng/ml)                   | 2.00±0.57   | 1.90±0.43   | 2.00±0.60   |
| E2/P on HCG day(pg/ml)                      | 2.69±1.44   | 2.59±1.32   | 2.96±1.55   |
| Thickness of endometrium on HCG day (cm)    | 1.10±0.21   | 1.05±0.19   | 1.09±0.22   |
| Numbers of oocytes obtained                 | 14.81±8.461 | 13.92±7.701 | 14.28±7.700 |
| Numbers of embryos obtained                 | 8.56±3.55   | 6.18±2.96   | 9.23±3.78   |
| Numbers of high-quality embryos obtained    | 3.46±1.96   | 3.96±1.88   | 5.25±2.23   |
| Numbers of embryos transferred              | 2.01±0.45   | 1.97±0.39   | 2.05±0.41   |
| Numbers of high-quality embryos transferred | 1.69±0.67   | 0.92±0.72   | 1.89±0.68   |

a: OAT = oligozoospermia, asthenospermia, teratozoospermia; b: UPF = uterine, pelviccavity, fallopian tube; c: Progressive motility (WHO4, grades a and b); d: Normal morphology rate of patients before May 2014 was standardized by WHO4. Normal morphology rate (WHO4 & WHO5) of patients after May 2014 was standardized by WHO5. Because of the difference of standardization between WHO4 and WHO5, the data was not shown; e: NS = not statistically significant.

#### Online Resource 2. Frequency of chromosomal polymorphism variation

| Karyotypes               | No. of males with heteromorphism | No. of females with heteromorphism |
|--------------------------|----------------------------------|------------------------------------|
| Total                    | 348                              | 99                                 |
| autosomal qh+            | 78                               | 68                                 |
| 1qh+                     | 45                               | 35                                 |
| 9qh+                     | 26                               | 26                                 |
| 16qh+                    | 7                                | 7                                  |
| inv(inv(Y) not included) | 17                               | 17                                 |
| inv(1)                   | 0                                | 3                                  |

|                                        |     |    |
|----------------------------------------|-----|----|
| inv(9)                                 | 17  | 14 |
| Chromosome variation<br>in D/G genomes | 19  | 14 |
| 13ps+                                  | 2   | 1  |
| 14ps+                                  | 1   | 1  |
| 15ps+                                  | 1   | 2  |
| 21ps+                                  | 7   | 3  |
| 22ps+                                  | 8   | 7  |
| Y chromosome variation                 | 234 | /  |
| Yqh+                                   | 211 | /  |
| Yqh-                                   | 22  | /  |
| inv(Y)                                 | 1   | /  |
